# Supplementary material for: Androgen receptor binding sites enabling genetic prediction of mortality due to prostate cancer in cancer-free subjects
Source: PubMed Central journal article supplement (PMC10447511; doi:10.1038/s41467-023-39858-8), 2023-08-23
Supplement: 41467_2023_39858_MOESM1_ESM.pdf [file 41467_2023_39858_MOESM1_ESM.pdf]

## Supplementary Information

Androgen receptor binding sites enabling genetic prediction of mortality due to prostate cancer in cancer-free subjects

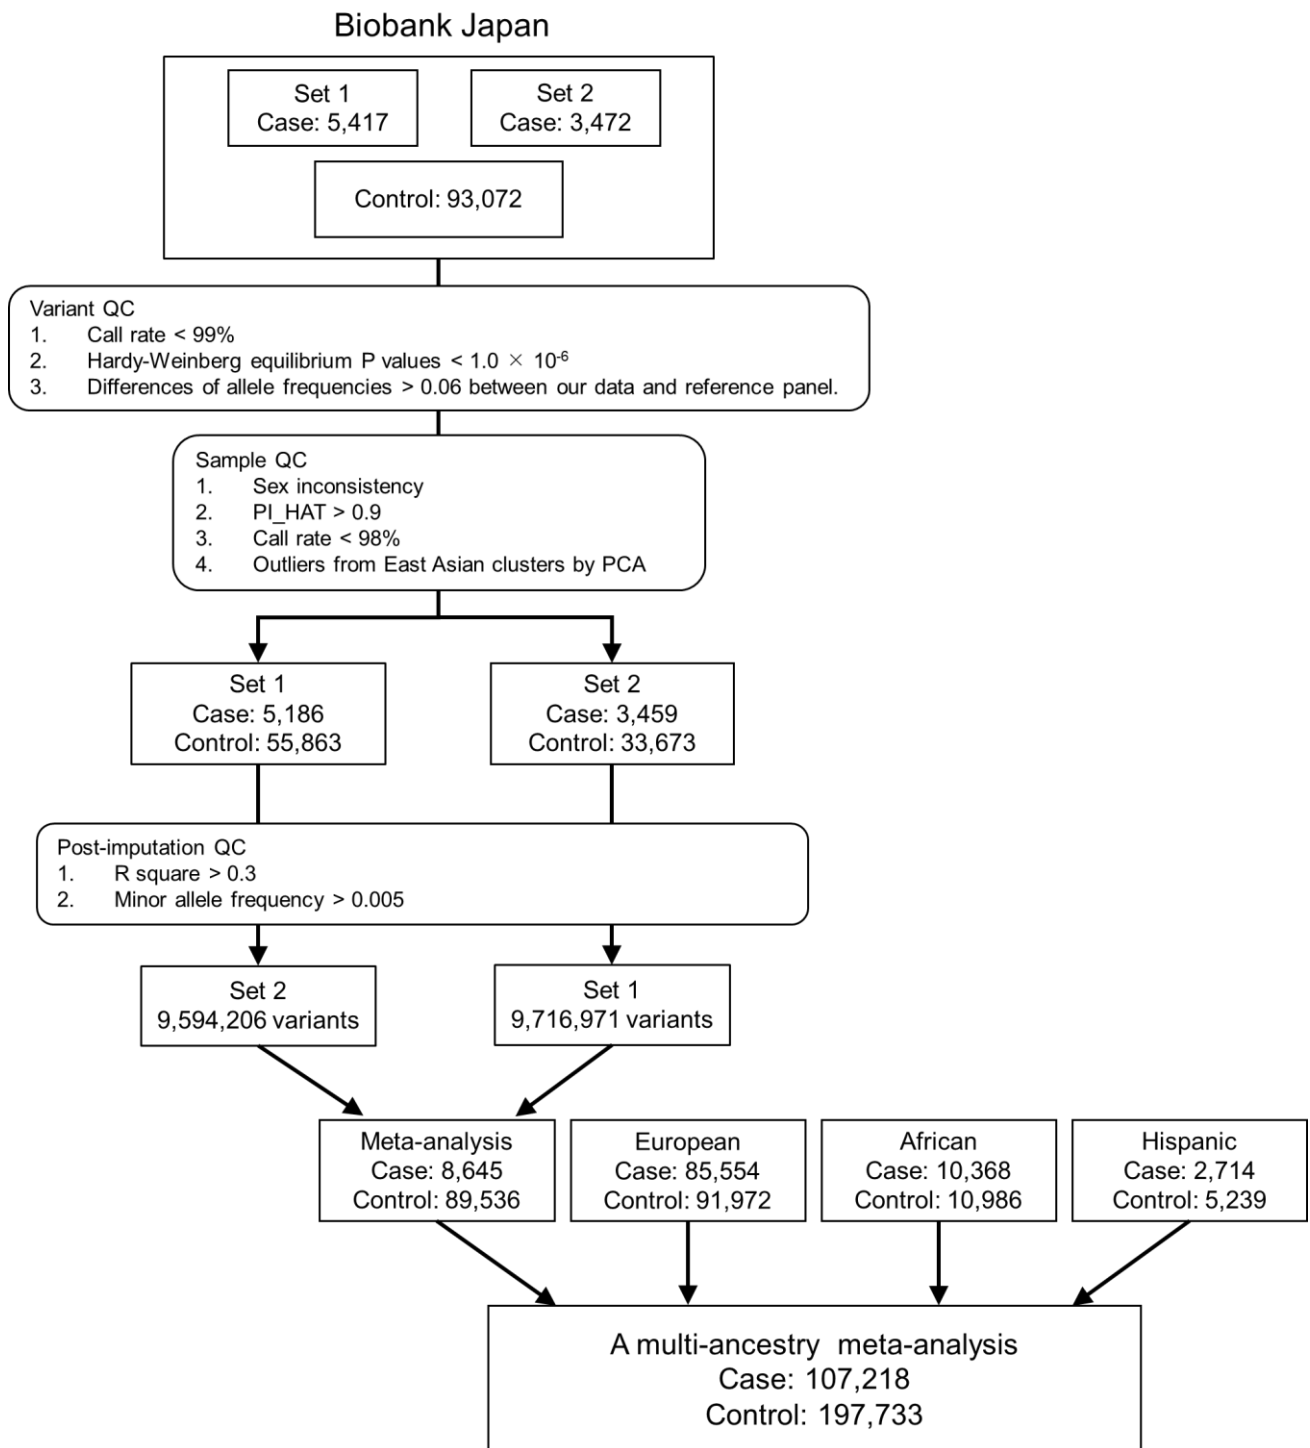

**Supplementary Figure 1.** An overview of the multi-ancestry meta-analysis for prostate cancer. PCA, principal component analysis; QC, quality control.

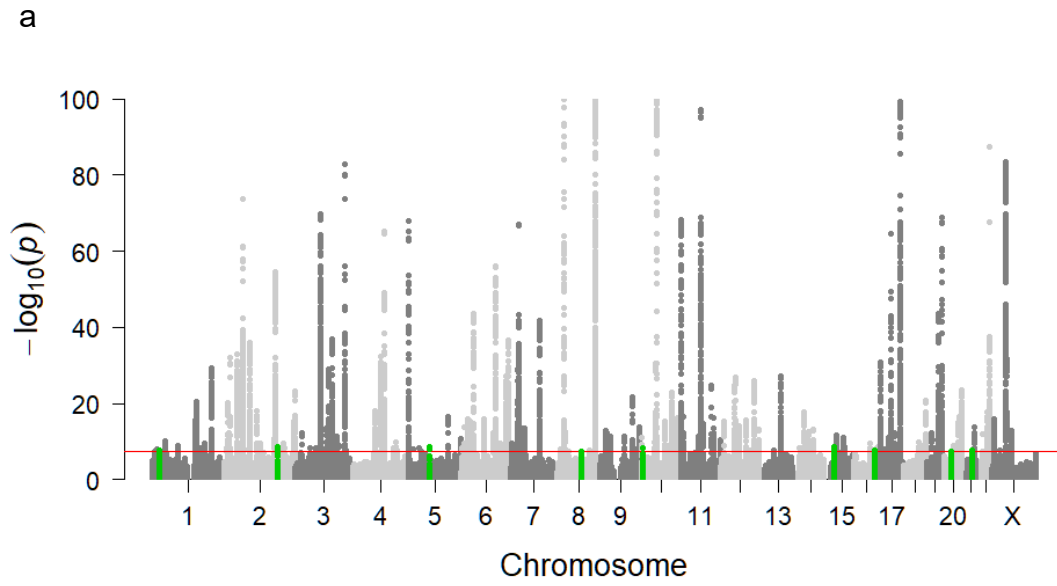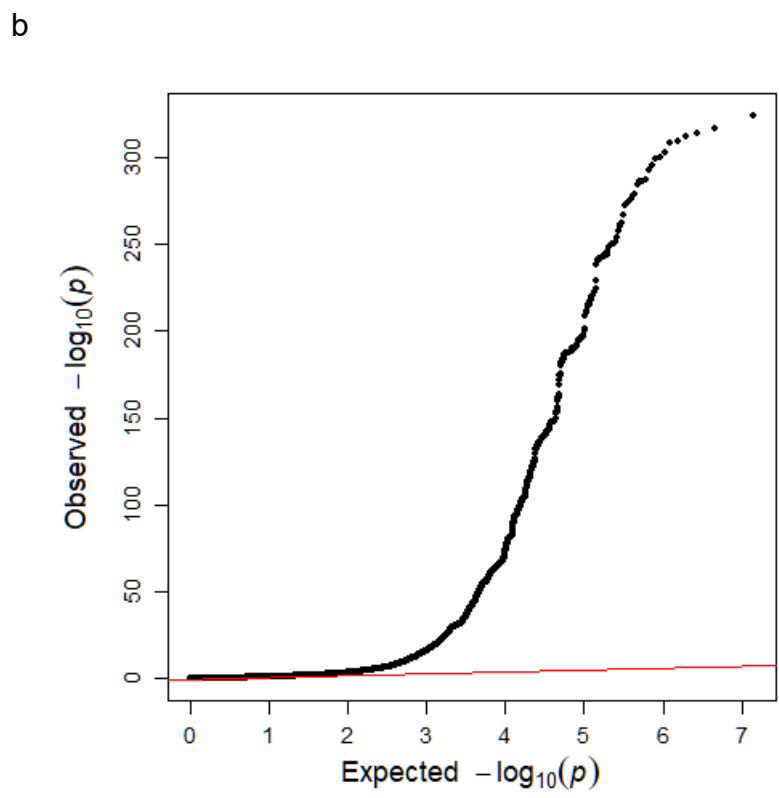

**Supplementary Figure 2.** The multi-ancestry meta-analysis for prostate cancer.

(a) Manhattan plot. Fixed-effect meta-analysis was performed with METAL. The x-axis is the chromosomal location, and the y-axis is the  $-\log_{10}[p \text{ value}]$  for each genetic variant. The horizontal red line represents the genome-wide significance ( $p < 5 \times 10^{-8}$ ). Green points represent novel loci.

(b) Q-Q plot showing the observed versus expected P values.

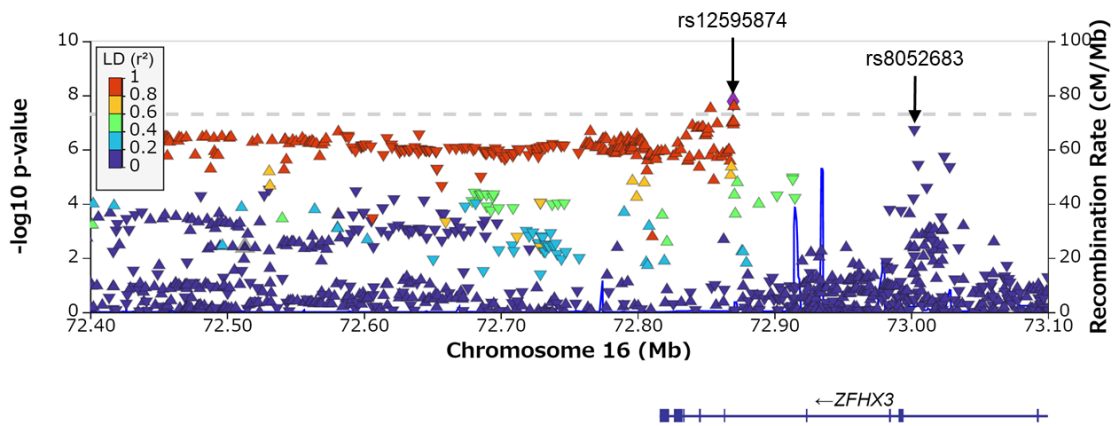

**Supplementary Figure 3.** A locus plot for the *ZFH3* region.

While we prioritized rs8052683 in Table 1 based on Bayes factor, this region contains variants exceeding p-value of  $5 \times 10^{-8}$  in the fixed effect model.

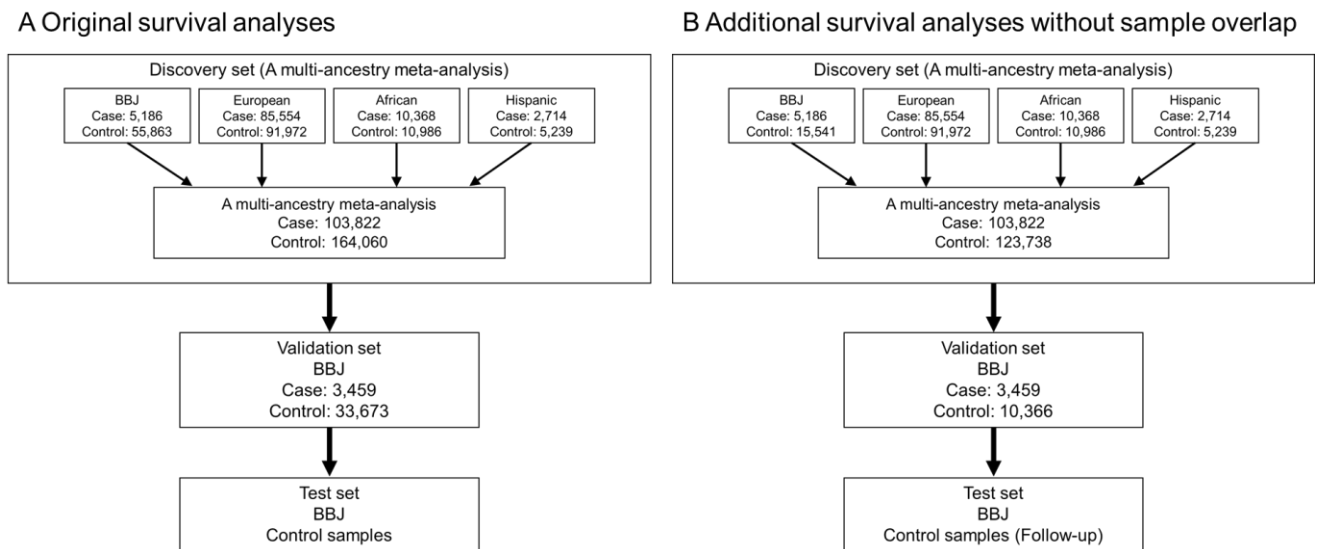

**Supplementary Figure 4.** A study design for survival analyses.

The data sets used for survival analyses are indicated. We conducted the analyses as shown in the left panel. Then to confirm the findings, we additionally conducted the analyses as shown in the right panel to avoid any sample overlap between survival analyses (test set) and case-control studies.

Supplementary Table 1. Biobank Japan subjects.

| <b>Study</b>               | <b>Set 1</b>                                                                                         |                                                                                                      | <b>Set 2</b>                 |                                                                                                      |
|----------------------------|------------------------------------------------------------------------------------------------------|------------------------------------------------------------------------------------------------------|------------------------------|------------------------------------------------------------------------------------------------------|
|                            | Case                                                                                                 | Control                                                                                              | Case                         | Control                                                                                              |
| <b>Source</b>              | BBJ 1st cohort                                                                                       | BBJ 1st cohort                                                                                       | BBJ 2nd cohort               | BBJ 1st cohort                                                                                       |
| <b>Number</b>              | 5,186                                                                                                | 55,863                                                                                               | 3,459                        | 33,673                                                                                               |
| <b>male/female</b>         | 5,186/0                                                                                              | 55,863/0                                                                                             | 3459/0                       | 33,673/0                                                                                             |
| <b>Age (s.d.)</b>          | 72.9 (7.0)                                                                                           | 62.8 (13.9)                                                                                          | 74.3 (7.3)                   | 62.7 (14.0)                                                                                          |
| <b>Genotyping platform</b> | Illumina<br>OmniExpressExome or<br>combination of Illumina<br>OmniExpress and<br>Illumina HumanExome | Illumina<br>OmniExpressExome or<br>combination of Illumina<br>OmniExpress and<br>Illumina HumanExome | Illumina<br>OmniExpressExome | Illumina<br>OmniExpressExome or<br>combination of Illumina<br>OmniExpress and<br>Illumina HumanExome |

The number of samples is after quality control.

BBJ, Biobank Japan

Supplementary Table 2. Genetic correlation between prostate cancer and other diseases in BBJ samples.

| Disease                   | rg     | SE    | z score | P value  | FDR   |
|---------------------------|--------|-------|---------|----------|-------|
| Peripheral artery disease | -0.300 | 0.087 | -3.410  | 6.00E-04 | 0.020 |
| Breast cancer             | 0.320  | 0.098 | 3.280   | 1.00E-03 | 0.020 |
| Chronic heart failure     | -0.290 | 0.094 | -3.100  | 1.90E-03 | 0.025 |
| Cataract                  | -0.310 | 0.129 | -2.420  | 0.016    | 0.153 |
| Cerebral aneurysm         | -0.200 | 0.090 | -2.240  | 0.025    | 0.172 |
| Ischemic stroke           | -0.170 | 0.077 | -2.220  | 0.026    | 0.172 |
| Pollinosis                | 0.240  | 0.116 | 2.090   | 0.036    | 0.202 |
| Uterine fibroid           | 0.210  | 0.120 | 1.710   | 0.086    | 0.392 |
| Stable angina pectoris    | -0.130 | 0.077 | -1.690  | 0.091    | 0.392 |
| Lung cancer               | 0.230  | 0.147 | 1.600   | 0.110    | 0.429 |
| Coronary artery disease   | -0.090 | 0.064 | -1.460  | 0.144    | 0.511 |
| Graves' disease           | -0.120 | 0.084 | -1.410  | 0.158    | 0.512 |
| Colorectal cancer         | 0.110  | 0.082 | 1.320   | 0.186    | 0.514 |
| Rheumatoid arthritis      | -0.130 | 0.099 | -1.290  | 0.196    | 0.514 |
| Nephrotic syndrome        | -0.240 | 0.187 | -1.280  | 0.200    | 0.514 |
| Arrhythmia                | -0.070 | 0.060 | -1.250  | 0.211    | 0.514 |
| Urolithiasis              | -0.100 | 0.083 | -1.170  | 0.244    | 0.557 |
| Chronic hepatitis B       | 0.160  | 0.144 | 1.110   | 0.265    | 0.557 |
| Chronic hepatitis C       | 0.130  | 0.118 | 1.070   | 0.283    | 0.557 |
| Cervical cancer           | 0.120  | 0.118 | 1.040   | 0.299    | 0.557 |
| Pulmonary tuberculosis    | 0.200  | 0.189 | 1.040   | 0.300    | 0.557 |
| COPD                      | -0.110 | 0.110 | -1.000  | 0.315    | 0.559 |
| Endometrial cancer        | 0.150  | 0.163 | 0.900   | 0.369    | 0.626 |
| Atopic dermatitis         | 0.070  | 0.096 | 0.780   | 0.438    | 0.681 |
| Ovarian cancer            | 0.160  | 0.226 | 0.690   | 0.488    | 0.681 |
| Cirrhosis                 | -0.130 | 0.188 | -0.680  | 0.494    | 0.681 |
| Unstable angina pectoris  | -0.070 | 0.100 | -0.660  | 0.510    | 0.681 |
| Hepatocellular carcinoma  | 0.140  | 0.216 | 0.630   | 0.528    | 0.681 |
| Keloid                    | -0.060 | 0.099 | -0.630  | 0.529    | 0.681 |
| Pancreatic cancer         | 0.140  | 0.236 | 0.590   | 0.553    | 0.681 |
| Myocardial infarction     | -0.040 | 0.072 | -0.590  | 0.558    | 0.681 |
| Gastric cancer            | 0.060  | 0.097 | 0.580   | 0.559    | 0.681 |
| Glaucoma                  | 0.050  | 0.089 | 0.530   | 0.596    | 0.705 |
| Esophageal cancer         | -0.040 | 0.091 | -0.490  | 0.626    | 0.718 |

|                 |        |       |        |       |       |
|-----------------|--------|-------|--------|-------|-------|
| Drug eruption   | -0.200 | 0.449 | -0.450 | 0.653 | 0.728 |
| Epilepsy        | -0.070 | 0.221 | -0.310 | 0.754 | 0.817 |
| Type 2 diabetes | -0.010 | 0.056 | -0.220 | 0.825 | 0.848 |
| Osteoporosis    | -0.020 | 0.101 | -0.220 | 0.826 | 0.848 |
| Asthma          | -0.010 | 0.073 | -0.180 | 0.861 | 0.861 |

BBJ, Biobank Japan; SE, standard error; FDR, false discovery rate

Supplementary Table 3. Genetic correlation between prostate cancer and other diseases in Europeans.

| Disease                   | rg     | SE    | z score | P value  |
|---------------------------|--------|-------|---------|----------|
| Peripheral artery disease | -0.072 | 0.053 | -1.326  | 1.85E-01 |
| Breast cancer             | 0.112  | 0.041 | 2.714   | 6.70E-03 |
| Chronic heart failure     | -0.055 | 0.039 | -1.403  | 1.61E-01 |

SE, standard error

Supplementary Table 4. Enrichment analysis for active enhancer by cell groups.

| Cell group           | Enrichment | P value  | FDR   |
|----------------------|------------|----------|-------|
| Gastrointestinal     | 4.301      | 5.60E-05 | 0.001 |
| Cardiovascular       | 4.273      | 4.14E-03 | 0.017 |
| Hematopoietic        | 2.349      | 5.18E-03 | 0.017 |
| Adrenal pancreas     | 5.178      | 0.014    | 0.035 |
| Other                | 2.428      | 0.018    | 0.036 |
| Connective bone      | 2.602      | 0.033    | 0.047 |
| Liver                | 3.923      | 0.029    | 0.047 |
| Kidney               | 4.705      | 0.061    | 0.077 |
| Skeletal muscle      | 2.718      | 0.092    | 0.102 |
| Central nerve system | 1.665      | 0.319    | 0.319 |

FDR, false discovery rate

Supplementary Table 5. Exonic variants with posterior probability > 0.1.

| rsID       | Chr | Position  | Ref | Alt | Gene          | Annotation | META  |      |          | BBJ   |          | EUR   |          | AFR   |          | HIS   |          |
|------------|-----|-----------|-----|-----|---------------|------------|-------|------|----------|-------|----------|-------|----------|-------|----------|-------|----------|
|            |     |           |     |     |               |            | Freq  | PP   | P-value  | Freq  | P-value  | EUR   | P-value  | AFR   | P-value  | Freq  | P-value  |
| rs1078004  | 2   | 85769711  | C   | G   | <i>MAT2A</i>  | synonymous | 0.445 | 0.10 | 3.29E-36 | 0.364 | 1.24E-04 | 0.463 | 8.63E-28 | 0.679 | 1.73E-05 | 0.400 | 2.35E-02 |
| rs11900747 | 2   | 121103903 | T   | G   | <i>INHBB</i>  | missense   | 0.150 | 0.40 | 3.54E-10 | 0.233 | 3.96E-03 | 0.078 | 5.01E-07 | 0.406 | 1.32E-02 | 0.091 | 3.21E-01 |
| rs76832527 | 2   | 242157241 | G   | A   | <i>ANO7</i>   | missense   | 0.143 | 0.90 | 5.25E-24 | 0.108 | 1.46E-01 | 0.173 | 5.00E-22 | 0.042 | 1.05E-02 | 0.152 | 3.10E-02 |
| rs2277283  | 11  | 61908440  | T   | C   | <i>INCENP</i> | missense   | 0.226 | 1.00 | 2.83E-12 | 0.080 | 3.32E-01 | 0.316 | 1.61E-10 | 0.166 | 5.24E-02 | 0.194 | 3.29E-02 |
| rs2066827  | 12  | 12871099  | T   | G   | <i>CDKN1B</i> | missense   | 0.204 | 1.00 | 8.94E-10 | 0.027 | 4.51E-01 | 0.242 | 4.42E-09 | 0.706 | 4.55E-02 | 0.203 | 8.33E-01 |
| rs138708   | 22  | 39138332  | G   | A   | <i>SUN2</i>   | missense   | 0.070 | 0.99 | 1.96E-18 | 0.162 | 4.02E-13 | 0.020 | 2.62E-06 | 0.010 | 3.87E-01 | 0.016 | 1.05E-01 |

Ref, reference allele; Alt, alternative allele; Freq, allele frequency of alternative allele; PP, posterior probability  
 META, meta-analysis; BBJ, Biobank Japan; EUR, Europeans; AFR, Africans; HIS, Hispanic

Supplementary Table 6. Enrichment analysis for androgen receptor binding sites by linkage disequilibrium score regression.

| Subject  | Cell type*      | Proportion of variants | Proportion of heritability | Enrichment | P value  |
|----------|-----------------|------------------------|----------------------------|------------|----------|
| BBJ      | prostate cancer | 0.013                  | 0.376                      | 29.335     | 3.21E-04 |
|          | prostate        | 0.014                  | 0.459                      | 33.962     | 6.08E-05 |
| European | prostate cancer | 0.012                  | 0.339                      | 27.867     | 2.37E-05 |
|          | prostate        | 0.013                  | 0.466                      | 36.199     | 3.94E-09 |

\*from ChIP-atlas.



Supplementary Table 7. GREGOR of androgen receptor binding sites by linkage disequilibrium of European ancestries.

| Cell type*            | SNP set   | Number of SNPs | Number of InBed SNPs | Expect | Fold enrichment | P value  |
|-----------------------|-----------|----------------|----------------------|--------|-----------------|----------|
| Prostate cancer cells | lead SNPs | 166            | 63                   | 29.704 | 2.121           | 1.74E-12 |
|                       | PP0.1     | 331            | 139                  | 59.486 | 2.337           | 5.40E-31 |
|                       | PP0.5     | 96             | 31                   | 13.128 | 2.361           | 1.25E-07 |
| Prostate cells        | lead SNPs | 166            | 82                   | 30.824 | 2.660           | 4.52E-26 |
|                       | PP0.1     | 331            | 170                  | 61.720 | 2.754           | 4.45E-53 |
|                       | PP0.5     | 96             | 42                   | 13.571 | 3.095           | 1.25E-15 |

GREGOR, Genomic Regulatory Elements and Gwas Overlap algoRithm; SNP, single nucleotide polymorphism  
\*from ChIP-atlas.

Supplementary Table 8. GREGOR of AR binding sites by LD of Asian ancestries.

| Cell type             | SNP set   | Number of SNPs | Number of InBed SNPs | Expect | Fold enrichment | P value  |
|-----------------------|-----------|----------------|----------------------|--------|-----------------|----------|
| Prostate cancer cells | lead SNPs | 166            | 64                   | 31.45  | 2.035           | 1.55E-11 |
|                       | PP0.1     | 331            | 141                  | 65.22  | 2.162           | 2.36E-27 |
|                       | PP0.5     | 96             | 32                   | 14.31  | 2.236           | 4.06E-07 |
| Prostate cells        | lead SNPs | 166            | 70                   | 32.35  | 2.164           | 1.17E-14 |
|                       | PP0.1     | 331            | 146                  | 66.31  | 2.202           | 1.23E-29 |
|                       | PP0.5     | 96             | 36                   | 14.59  | 2.468           | 1.77E-09 |

GREGOR, Genomic Regulatory Elements and Gwas Overlap algoRithm; LD, linkage disequilibrium; SNP, single nucleotide polymorphism  
PrCa cells, AR binding sites in PrCa cells from ChIP-atlas; Prostate, AR binding sites in Prostate cells from ChIP-atlas.

Supplementary Table 9. Variants with PP > 0.1 located on androgen receptor binding sites.

| <b>rsID</b> | <b>Chromosome</b> | <b>Position</b> | <b>Posterior probability</b> |
|-------------|-------------------|-----------------|------------------------------|
| rs1574259   | 2                 | 173313453       | 0.12                         |
| rs74001374  | 2                 | 238411293       | 0.12                         |
| rs7591218   | 2                 | 43637998        | 1.00                         |
| rs10188360  | 2                 | 8597823         | 0.25                         |
| rs10190752  | 2                 | 8597888         | 0.63                         |
| rs1283108   | 3                 | 106961285       | 0.18                         |
| rs78416326  | 3                 | 170074517       | 1.00                         |
| rs9815122   | 3                 | 23155056        | 0.16                         |
| rs9872872   | 3                 | 23155128        | 0.20                         |
| rs2280283   | 4                 | 152020777       | 0.10                         |
| rs6853490   | 4                 | 95544718        | 1.00                         |
| rs199577062 | 5                 | 1889346         | 1.00                         |
| rs1887414   | 6                 | 109292736       | 0.19                         |
| rs2018336   | 6                 | 11217897        | 1.00                         |
| rs13215045  | 6                 | 153447516       | 0.95                         |
| rs150765082 | 6                 | 160581543       | 1.00                         |
| rs1983891   | 6                 | 41536427        | 0.16                         |
| rs9472119   | 6                 | 43709703        | 0.26                         |
| rs9472120   | 6                 | 43709785        | 0.38                         |
| rs9472121   | 6                 | 43710015        | 0.31                         |
| rs9655205   | 7                 | 20999211        | 0.15                         |
| rs67152137  | 7                 | 27975919        | 0.23                         |
| rs10486567  | 7                 | 27976563        | 0.55                         |
| rs6465657   | 7                 | 97816327        | 0.35                         |
| rs6465658   | 7                 | 97816638        | 0.11                         |
| rs11986220  | 8                 | 128531689       | 1.00                         |
| rs1160267   | 8                 | 23529521        | 0.99                         |
| rs12634     | 9                 | 132573536       | 0.30                         |

|            |    |           |      |
|------------|----|-----------|------|
| rs17694493 | 9  | 22041998  | 1.00 |
| rs1417078  | 9  | 82104658  | 0.18 |
| rs4962419  | 10 | 126697114 | 0.16 |
| rs12769019 | 10 | 126697327 | 0.16 |
| rs12769682 | 10 | 126697494 | 0.27 |
| rs10993994 | 10 | 51549496  | 1.00 |
| rs75184941 | 11 | 134277750 | 0.12 |
| rs767127   | 14 | 69134264  | 0.86 |
| rs3893264  | 16 | 54683802  | 0.95 |
| rs78012083 | 16 | 72870564  | 0.20 |
| rs78971197 | 16 | 72870587  | 0.20 |
| rs72811264 | 17 | 12576704  | 0.43 |
| rs684232   | 17 | 618965    | 0.98 |
| rs2659124  | 19 | 51354597  | 1.00 |
| rs11698745 | 20 | 25216113  | 0.12 |
| rs5759167  | 22 | 43500212  | 1.00 |

Supplementary Table 10. Cox proportional hazard model for death from prostate cancer using polygenic risk scores (PRSs).

|                    | score                 | HR (95%CI)       | Pr(> z )              |
|--------------------|-----------------------|------------------|-----------------------|
| GWAS_PRS           | quantitative          | 1.55 (1.32-1.83) | 1.6x10 <sup>-7</sup>  |
|                    | Top 10% vs bottom 50% | 3.52 (1.97-6.28) | 2.0x10 <sup>-5</sup>  |
| AR_prioritized_PRS | quantitative          | 1.61 (1.39-1.86) | 2.2x10 <sup>-10</sup> |
|                    | Top 10% vs bottom 50% | 5.57 (3.25-9.54) | 4.2x10 <sup>-10</sup> |

HR: hazard ratio, CI: confidence interval, GWAS\_PRS: PRS simply constructed by GWAS results using P/T method

Supplementary Table 11. Cox proportional hazard model for death from prostate cancer using polygenic risk scores (PRSs) without any sample overlap between case-control and survival studies.

|                    | score                 | HR (95%CI)        | Pr(> z )              |
|--------------------|-----------------------|-------------------|-----------------------|
| GWAS_PRS           | quantitative          | 1.44 (1.24-1.67)  | 1.7x10 <sup>-7</sup>  |
|                    | Top 10% vs bottom 50% | 4.01 (2.40-6.70)  | 1.1x10 <sup>-5</sup>  |
|                    | Top 1% vs bottom 50%  | 6.61 (2.30-19.04) | 4.6x10 <sup>-4</sup>  |
| AR_prioritized_PRS | quantitative          | 2.08 (1.62-2.67)  | 9.3x10 <sup>-9</sup>  |
|                    | Top 10% vs bottom 50% | 4.58 (2.66-7.89)  | 4.0x10 <sup>-8</sup>  |
|                    | Top 1% vs bottom 50%  | 16.70 (2.66-7.89) | 8.3x10 <sup>-12</sup> |

HR: hazard ratio, CI: confidence interval, GWAS\_PRS: PRS simply constructed by GWAS results using P/T method

Supplementary Table 12. Cox proportional hazard model for death in subjects with prostate cancer using AR-prioritized polygenic risk scores (PRSs).

| score                 | HR (95%CI)       | Pr(> z ) |
|-----------------------|------------------|----------|
| Top 10% vs bottom 50% | 1.08 (0.89-1.30) | 0.45     |
| Top 1% vs bottom 50%  | 1.37 (0.81-2.33) | 0.25     |

HR: hazard ratio, CI: confidence interval

## The BioBank Japan Project Consortium

Akihide Masumoto<sup>a</sup>, Akiko Nagai<sup>c</sup>, Daisuke Obata<sup>c</sup>, Hiroki Yamaguchi<sup>d</sup>, Kaori Muto<sup>e</sup>, Kazuhisa Takahashi<sup>f</sup>, Ken Yamaji<sup>g</sup>, Kozo Yoshimori<sup>h</sup>, Masahiko Higashiyama<sup>i</sup>, Nobuaki Sinozaki<sup>j</sup>, Satoshi Asai<sup>k</sup>, Satoshi Nagayama<sup>l</sup>, Shigeo Murayama<sup>m</sup>, Shiro Minami<sup>n</sup>, Takao Suzuki<sup>o</sup>, Takayuki Morisaki<sup>p</sup>, Wataru Obara<sup>q</sup>, Yasuo Takahashi<sup>r</sup>, Yoichi Furukawa<sup>s</sup>, Yoshinori Murakami<sup>t</sup>, Yuji Yamanashi<sup>u</sup>, Yukihiro Koretsune<sup>v</sup>

<sup>a</sup>IIZUKA HOSPITAL, Fukuoka, Japan; <sup>b</sup>Department of Public Policy, Institute of Medical Science, The University of Tokyo, Tokyo, Japan; <sup>c</sup>Center for Clinical Research and Advanced Medicine, Shiga University of Medical Science, Shiga, Japan; <sup>d</sup>Department of Hematology, Nippon Medical School, Tokyo, Japan; <sup>e</sup>Department of Public Policy, Institute of Medical Science, The University of Tokyo, Tokyo, Japan; <sup>f</sup>Department of Respiratory Medicine, Juntendo University Graduate School of Medicine, Tokyo, Japan; <sup>g</sup>Department of Internal Medicine and Rheumatology, Juntendo University Graduate School of Medicine, Tokyo, Japan; <sup>h</sup>Fukujuji Hospital, Japan Anti-Tuberculosis Association, Tokyo, Japan; <sup>i</sup>Department of General Thoracic Surgery, Osaka International Cancer Institute, Osaka, Japan; <sup>j</sup>Tokushukai Group, Tokyo, Japan; <sup>k</sup>Division of Pharmacology, Department of Biomedical Science, Nihon University School of Medicine, Tokyo, Japan. Division of Genomic Epidemiology and Clinical Trials, Clinical Trials Research Center, Nihon University. School of Medicine, Tokyo, Japan; <sup>l</sup>The Cancer Institute Hospital of the Japanese Foundation for Cancer Research, Tokyo, Japan; <sup>m</sup>Tokyo Metropolitan Geriatric Hospital and Institute of Gerontology, Tokyo, Japan; <sup>n</sup>Department of Bioregulation, Nippon Medical School, Kawasaki, Japan; <sup>o</sup>Tokushukai Group, Tokyo, Japan; <sup>p</sup>Division of Molecular Pathology IMSUT Hospital, Department of Internal Medicine Project Division of Genomic Medicine and Disease Prevention The Institute of Medical Science The University of Tokyo, Tokyo, Japan; <sup>q</sup>Department of Urology, Iwate Medical University, Iwate, Japan; <sup>r</sup>Division of Genomic Epidemiology and Clinical Trials, Clinical Trials Research Center, Nihon University School of Medicine, Tokyo, Japan; <sup>s</sup>Division of Clinical Genome Research, Institute of Medical Science, The University of Tokyo, Tokyo, Japan; <sup>t</sup>Department of Cancer Biology, Institute of Medical Science, The University of Tokyo, Tokyo, Japan; <sup>u</sup>Division of Genetics, The Institute of Medical Science, The University of Tokyo, Tokyo, Japan; <sup>v</sup>National Hospital Organization Osaka National Hospital, Osaka, Japan
